# Supplementary material for: Coevolution and Life Cycle Specialization of Plant Cell Wall Degrading Enzymes in a Hemibiotrophic Pathogen
Source: PubMed Central journal article supplement — Mol Biol Evol. 2013 Mar 20;30(6):1337–47. doi: 10.1093/molbev/mst041 (PMC3649673; doi:10.1093/molbev/mst041), 2013-03-20

## Supplementary Results

Summary of the main findings according to each class of PCWDE.

### *Cutinases*

All six cutinase genes found in *Z. tritici* were confirmed in *Z. pseudotritici* and *Z. ardabiliae* and four were found in *Z. passerinii* (supplementary table S1). All cutinases were functionally assigned to the CAZy family Carbohydrate Esterases 5 (CE5). Estimated neutrality indices from the MKTs did not deviate significantly from neutral expectations for the pooled CE5 data set (supplementary table S3b). But at the level of individual genes, two of the six genes had neutrality indices significantly different from zero (fig. 3). CE5-ProtID-99331 was identified as being under significant diversifying selection ( $-\log_{10}NI = 0.356$ ,  $p = 0.011$ ;  $\alpha = 0.559$ ) while CE5- ProtID-18212 exhibited significant purifying selection (supplementary table S3a).

On the lineage specific level, we found a significant five-fold increase in dN / dS for CE5-ProtID-18212 of *Z. tritici* compared to its ancestors, indicating an increase in diversifying selection between species (supplementary table S4). All other cutinases showed dN /dS values not significantly different from the single rate model.

### *Cellulases*

All eleven cellulase genes were confirmed in *Z. tritici*, *Z. pseudotritici* and *Z. ardabiliae* and nine were found in *Z. passerinii* (supplementary table S1). The cellulases were assigned to five different CAZy families. Two of these families, Glycoside Hydrolases 5 (GH5) and GH61, were multi-gene families with six and two members, respectively. The individual members of these two families as well as the pooled data sets did not deviate from neutral expectations in the MKTs. GH45-ProtID-76589 was the only cellulase undergoing significant diversifying selection ( $-\log_{10}NI = 0.390$ ,  $p < 0.001$ ,  $\alpha = 0.593$ ). None of the cellulases showed evidence for significant purifying selection (fig. 3; supplementary tables S3a and S3b).

### *Hemicellulases*

Eighteen hemicellulase genes belonging to seven CAZy families exist in *Z. tritici*. Sixteen of the genes were confirmed in all species, but six could not be detected in *Z. passerinii* (supplementary table S1). CAZy families GH10, GH43 and GH51 were

multigene families with two, nine and three members, respectively. Multilocus MKTs on the pooled members resulted in evidence of significant purifying selection for CAZy family GH51, GH10 was neutral and no multilocus MKT could be calculated for GH43 because of heterogeneity among all pairwise comparisons (fig. 3; supplementary table S3b).

At the individual gene level, however, three of the nine GH43 genes (ProtIDs-73095, 98714, and 84076) and one of the three GH51 genes (ProtID-40215) were identified as being under significant purifying selection. Purifying selection was also indicated for the gene GH54-ProtID-70396. GH62-ProtID-68922 was the only hemicellulase gene showing significant diversifying selection ( $-\log_{10}NI = 0.686$ ,  $p < 0.001$ ,  $\alpha = 0.794$ ; fig. 3; supplementary table S3a).

The HYPHY analyses indicated widespread heterogeneity in selection pressure in this class of PCWDEs. Six of the 18 hemicellulases of *Z. tritici* showed significantly reduced dN / dS values compared to their ancestors, indicating increased purifying selection, e.g. due to substrate optimization on the new wheat host.

### *Pectinases*

Among the 13 pectinase genes in *Z. tritici*, all were confirmed in *Z. pseudotritici*, 11 were found in *Z. ardabiliae* and eight were found in *Z. passerinii*. The pectinases were distributed among eight CAZy families; five of these families included two members each (supplementary table S1). MKTs on the pooled members of CAZy families detected significant purifying selection for GH88 (fig. 3; supplementary table S3b). The pectinases are dominated by purifying selection and are the only class of enzymes without a gene showing significant diversifying selection. Eleven out of the 13 individual genes had negative NIs with five showing significant evidence of purifying selection (ProtIDs-77196, 25958, 33711, 50077, 65051, and 27839; fig. 3; supplementary table S3a).

On the phylogenetic level, one gene (GH115-ProtID-65051) showed a significant threefold reduction in dN / dS for *Z. tritici* (fig. 4; supplementary table S4).

**Supplementary table S1:** Identification of homologues and orthologues gene sequences coding for cell wall degrading enzymes in 19 whole genome assemblies of *Zymoseptoria tritici* and its closest relatives.

BLAST searches used search-algorithms of > 50% nucleotide identity and >50% sequence length identity with respect to 48 annotated CWDEs from the *Z. tritici* isolate IPO323 genome. Number of amino acids and average amino acid identity (AA\_ID) are given with respect to IPO323. Genes are listed by enzymatic families according to the Carbohydrate-Active EnZymes database (CAZy) and the protein identification number (Prot\_ID) from the Joint Genome Institute (JGI).

|                   | JGI                    |         | <i>Z. tritici</i> (N=9) |             | <i>Z. pseudotritici</i> (N=5) |             | <i>Z. ardabiliae</i> (N=4) |             | <i>Z. passerinii</i> (N=1) |             |         |       |
|-------------------|------------------------|---------|-------------------------|-------------|-------------------------------|-------------|----------------------------|-------------|----------------------------|-------------|---------|-------|
|                   | CAZy                   | PROT_ID | IPO323 amino acids      | amino acids | % AA_ID                       | amino acids | % AA_ID                    | amino acids | % AA_ID                    | amino acids | % AA_ID |       |
| <b>Cutinases</b>  | CE5                    | 77282   | 231                     | 231         | 99.00                         | 231         | 96.20                      | 231         | 94.00                      | 231         | 88.00   |       |
|                   | CE5                    | 68483   | 216                     | 216         | 99.00                         | 216         | 97.00                      | 216         | 97.00                      | 214         | 82.00   |       |
|                   | CE5                    | 35055   | 108                     | 108         | 98.00                         | 108         | 97.00                      | 108         | 87.50                      | -           | -       |       |
|                   | CE5                    | 99331   | 239                     | 239         | 99.00                         | 239         | 94.20                      | 141         | 87.65                      | -           | -       |       |
|                   | CE5                    | 43394   | 232                     | 232         | 99.33                         | 232         | 98.60                      | 232         | 96.00                      | 232         | 90.00   |       |
|                   | CE5                    | 18212   | 202                     | 202         | 99.89                         | 202         | 99.00                      | 202         | 95.00                      | 202         | 84.00   |       |
| <b>Cellulases</b> | GH5                    | 71664   | 495                     | 495         | 99.78                         | 495         | 95.20                      | 495         | 93.00                      | 495         | 88.00   |       |
|                   | GH5                    | 88889   | 418                     | 418         | 98.89                         | 418         | 98.00                      | 418         | 98.00                      | 418         | 92.00   |       |
|                   | GH5                    | 106779  | 417                     | 417         | 99.78                         | 417         | 98.00                      | 417         | 96.50                      | -           | -       |       |
|                   | GH5                    | 83843   | 616                     | 616         | 98.56                         | 616         | 98.00                      | 616         | 94.50                      | 616         | 86.00   |       |
|                   | GH5                    | 92097   | 364                     | 364         | 98.86                         | 364         | 89.59                      | 364         | 87.81                      | 363         | 81.73   |       |
|                   | GH5                    | 111224  | 1085                    | 1085        | 99.98                         | 1085        | 93.45                      | 1085        | 92.89                      | 1084        | 85.27   |       |
|                   | GH7                    | 100252  | 444                     | 444         | 100.00                        | 444         | 99.00                      | 444         | 98.00                      | 444         | 94.00   |       |
|                   | GH12                   | 105871  | 246                     | 246         | 98.78                         | 246         | 92.40                      | 246         | 91.00                      | 245         | 80.00   |       |
|                   | GH45                   | 76589   | 240                     | 240         | 99.44                         | 240         | 90.20                      | 240         | 85.25                      | 187         | 77.00   |       |
|                   | GH61                   | 33254   | 320                     | 320         | 98.50                         | 320         | 92.00                      | 284         | 89.50                      | -           | -       |       |
|                   | GH61                   | 103512  | 390                     | 390         | 97.44                         | 390         | 95.00                      | 390         | 92.50                      | 390         | 87.00   |       |
|                   | <b>Hemi-cellulases</b> | GH10    | 94846                   | 370         | 370                           | 99.00       | 370                        | 96.00       | 370                        | 94.00       | 369     | 84.00 |
| GH10              |                        | 61141   | 348                     | 348         | 99.81                         | 348         | 90.49                      | 348         | 88.76                      | -           | -       |       |
| GH11              |                        | 60105   | 225                     | 167         | 100.00                        | 167         | 94.00                      | 167         | 91.00                      | -           | -       |       |
| GH43              |                        | 98714   | 324                     | 324         | 98.56                         | 324         | 96.00                      | 324         | 94.00                      | 324         | 94.00   |       |
| GH43              |                        | 105323  | 319                     | 319         | 98.56                         | 319         | 95.00                      | 319         | 95.00                      | -           | -       |       |
| GH43              |                        | 96505   | 385                     | 385         | 87.56                         | 385         | 83.00                      | 385         | 82.50                      | 385         | 77.00   |       |
| GH43              |                        | 84076   | 545                     | 545         | 97.00                         | 535         | 95.00                      | 545         | 93.00                      | 545         | 86.00   |       |
| GH43              |                        | 75584   | 294                     | 294         | 100.00                        | 294         | 97.00                      | 294         | 93.00                      | 294         | 82.00   |       |
| GH43              |                        | 96947   | 679                     | 679         | 96.91                         | 679         | 91.85                      | 679         | 89.61                      | -           | -       |       |
| GH43              |                        | 73095   | 322                     | 322         | 99.58                         | 322         | 96.57                      | 322         | 92.51                      | 322         | 86.60   |       |
| GH43              |                        | 30121   | 297                     | 222         | 98.94                         | 225         | 90.28                      | 222         | 87.68                      | -           | -       |       |
| GH43              |                        | 105728  | 341                     | 341         | 98.90                         | 341         | 90.22                      | 341         | 90.45                      | 344         | 81.84   |       |
| GH51              |                        | 71466   | 633                     | 633         | 99.71                         | 633         | 95.85                      | 633         | 93.11                      | 633         | 85.64   |       |
| GH51              |                        | 111130  | 691                     | 691         | 96.75                         | 691         | 92.70                      | 687         | 88.87                      | 690         | 85.47   |       |
| GH51              |                        | 40215   | 503                     | 503         | 98.87                         | 503         | 95.52                      | 503         | 92.80                      | 503         | 85.79   |       |
| GH54              |                        | 70396   | 502                     | 502         | 98.22                         | 502         | 96.40                      | 502         | 94.00                      | 502         | 88.00   |       |
| GH62              |                        | 68922   | 321                     | 321         | 99.89                         | 321         | 98.00                      | 321         | 90.75                      | 321         | 88.00   |       |
| GH93              |                        | 95102   | 417                     | 416         | 99.62                         | 416         | 91.98                      | 414         | 88.83                      | -           | -       |       |
| <b>Pectinases</b> | CE8                    | 66866   | 330                     | 330         | 99.30                         | 330         | 95.00                      | 330         | 94.00                      | 330         | 82.00   |       |
|                   | GH28                   | 86032   | 416                     | 416         | 99.22                         | 416         | 97.00                      | 416         | 93.00                      | 416         | 86.00   |       |
|                   | GH28                   | 77196   | 491                     | 491         | 99.78                         | 491         | 88.00                      | 491         | 92.00                      | 491         | 78.00   |       |
|                   | GH53                   | 25958   | 332                     | 332         | 98.78                         | 332         | 97.60                      | -           | -                          | -           | -       |       |
|                   | GH53                   | 51381   | 342                     | 342         | 99.67                         | 342         | 97.00                      | 342         | 90.50                      | -           | -       |       |
|                   | GH78                   | 33711   | 798                     | 798         | 99.27                         | 798         | 94.27                      | 798         | 94.15                      | -           | -       |       |
|                   | GH78                   | 69329   | 680                     | 680         | 99.76                         | 680         | 95.05                      | -           | -                          | -           | -       |       |
|                   | GH88                   | 50077   | 380                     | 380         | 97.72                         | 380         | 94.20                      | 380         | 93.23                      | 380         | 78.28   |       |
|                   | GH88                   | 57259   | 388                     | 388         | 97.49                         | 388         | 96.05                      | 388         | 94.33                      | 388         | 79.38   |       |
|                   | GH115                  | 65051   | 1024                    | 1024        | 99.17                         | 1024        | 93.49                      | 1024        | 91.84                      | 1024        | 82.50   |       |
|                   | PL1                    | 42327   | 342                     | 342         | 98.11                         | 342         | 91.80                      | 342         | 91.00                      | 342         | 83.00   |       |
|                   | PL1                    | 85457   | 324                     | 324         | 94.78                         | 324         | 90.00                      | 324         | 91.00                      | -           | -       |       |
|                   | PL3                    | 27839   | 215                     | 215         | 100.00                        | 215         | 96.40                      | 215         | 95.50                      | 215         | 89.00   |       |
|                   | <b>Average</b>         |         |                         |             |                               | 98.65       |                            | 94.47       |                            | 92.10       |         | 84.77 |









Supplementary Fig. S1

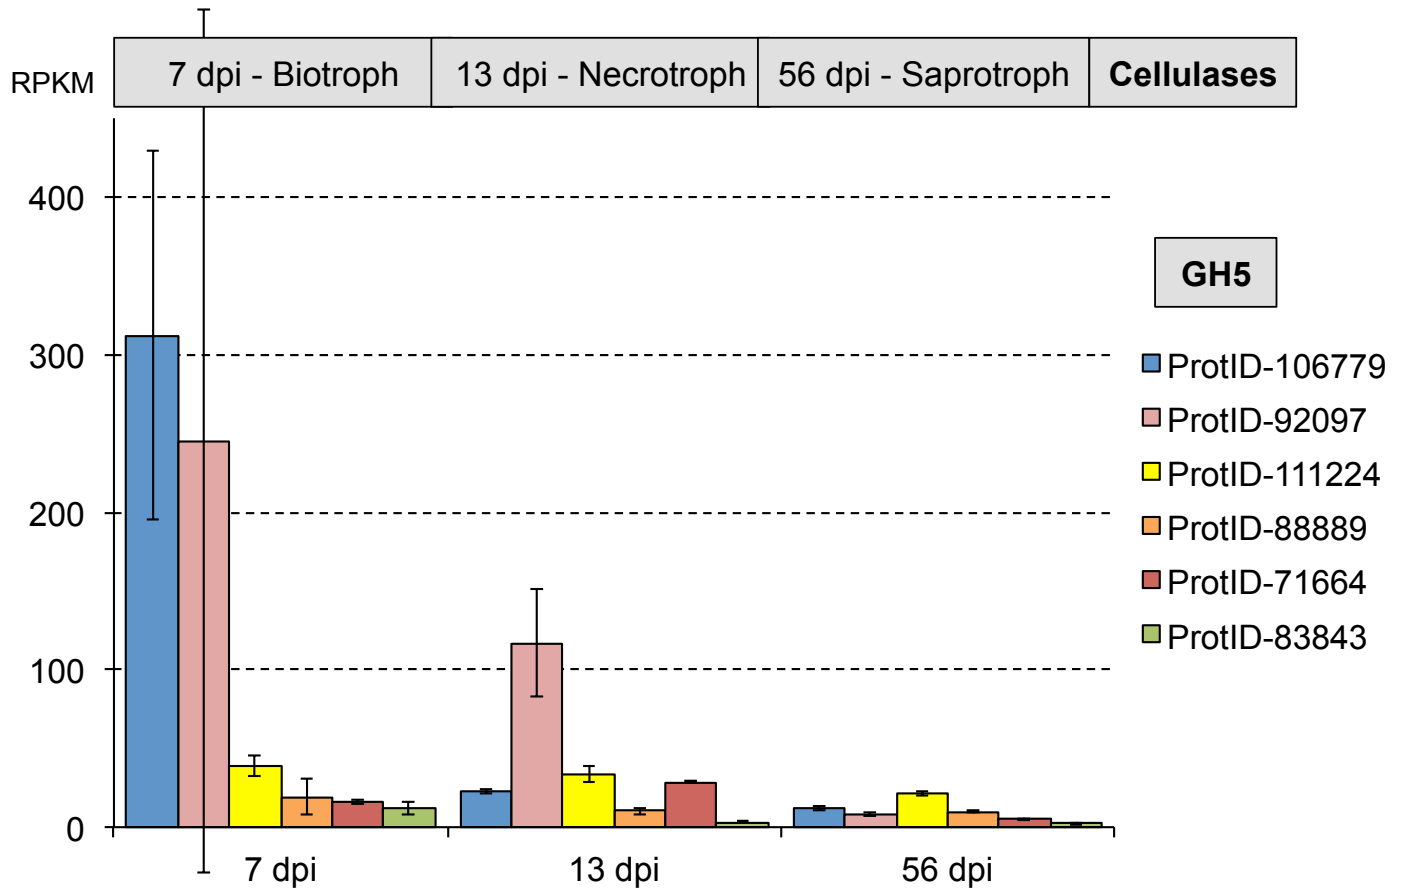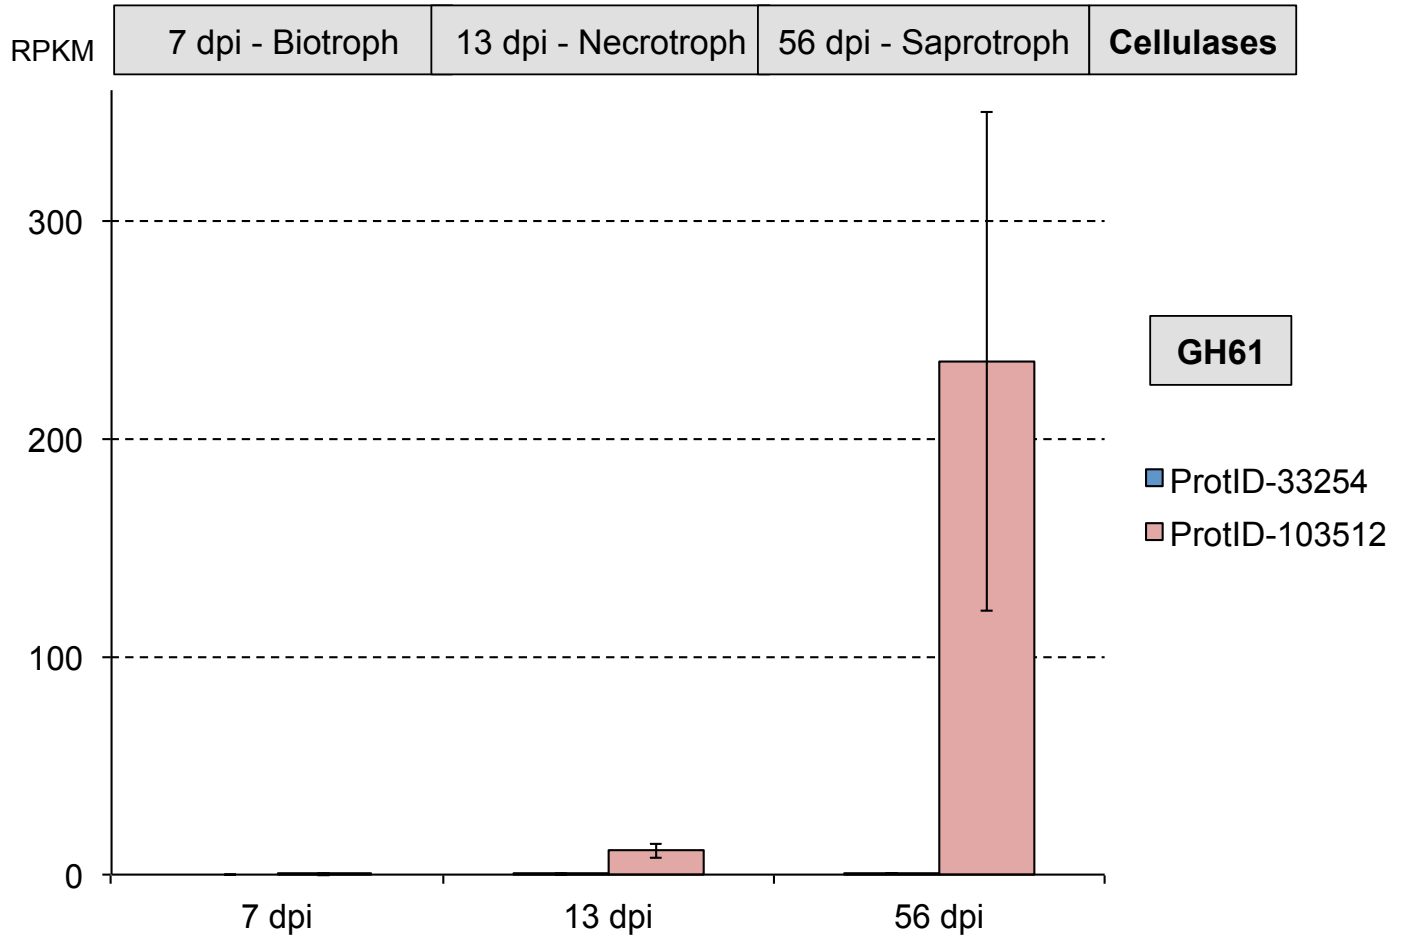



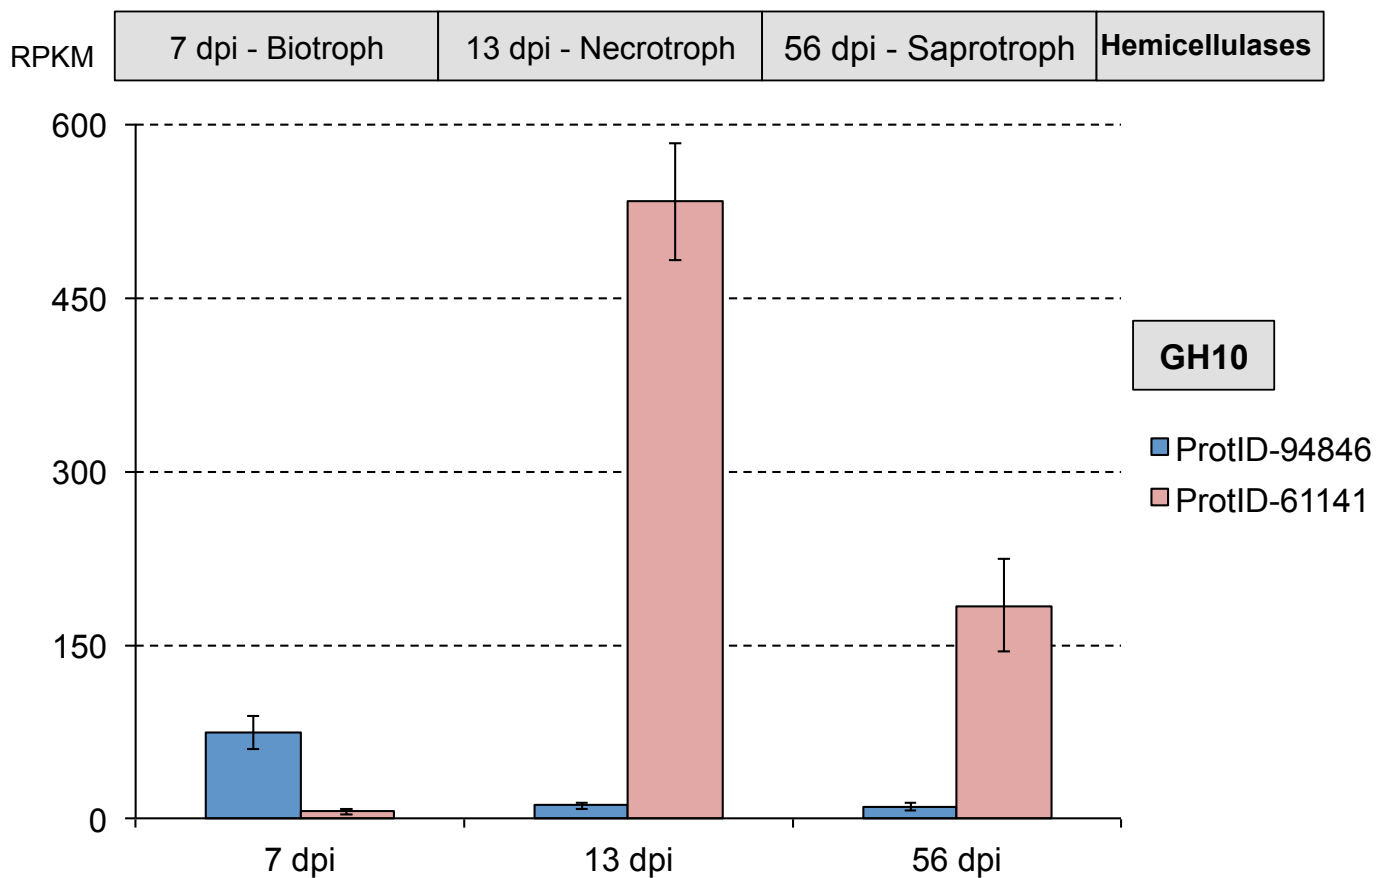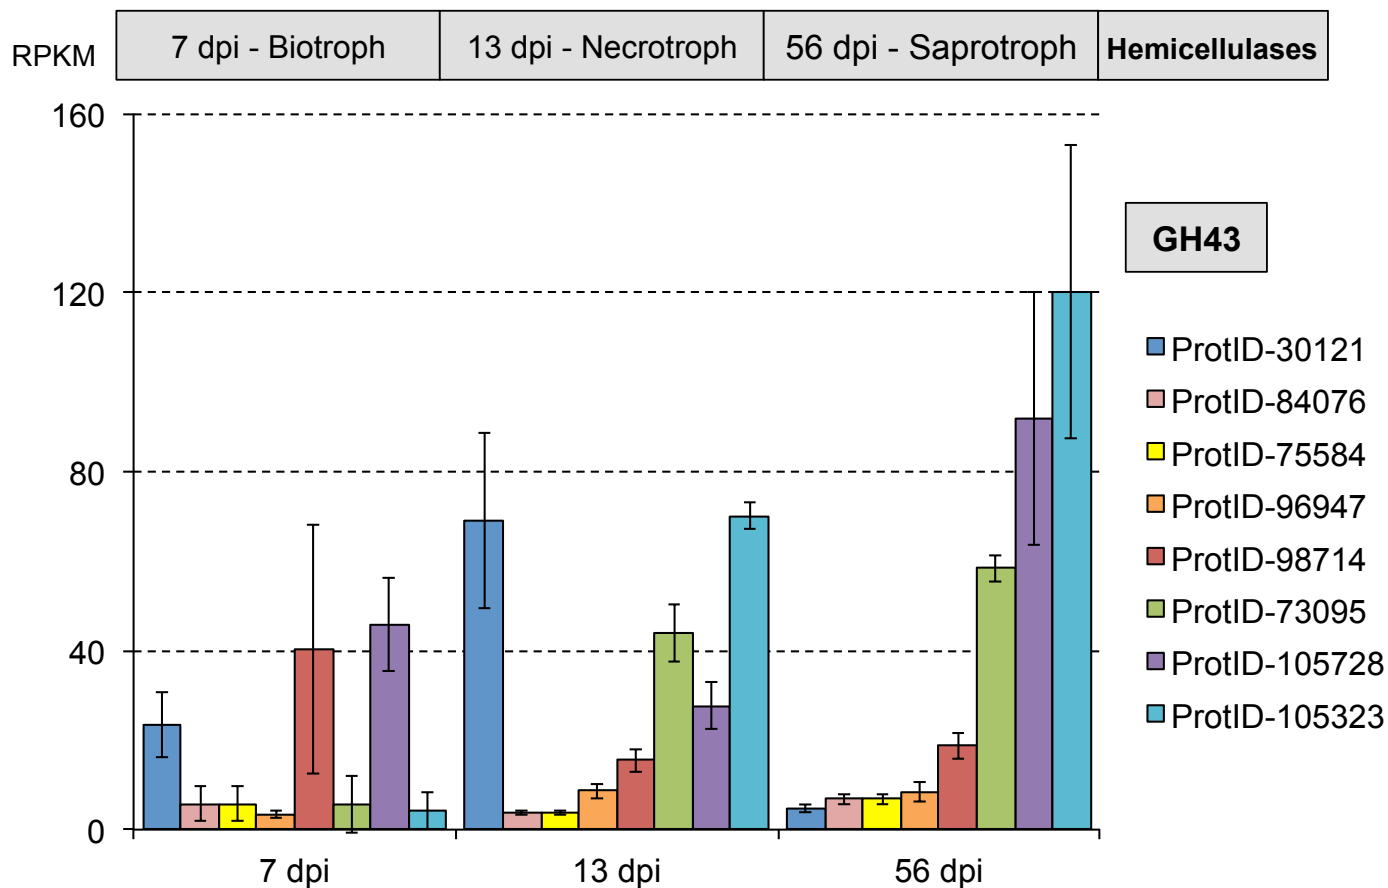

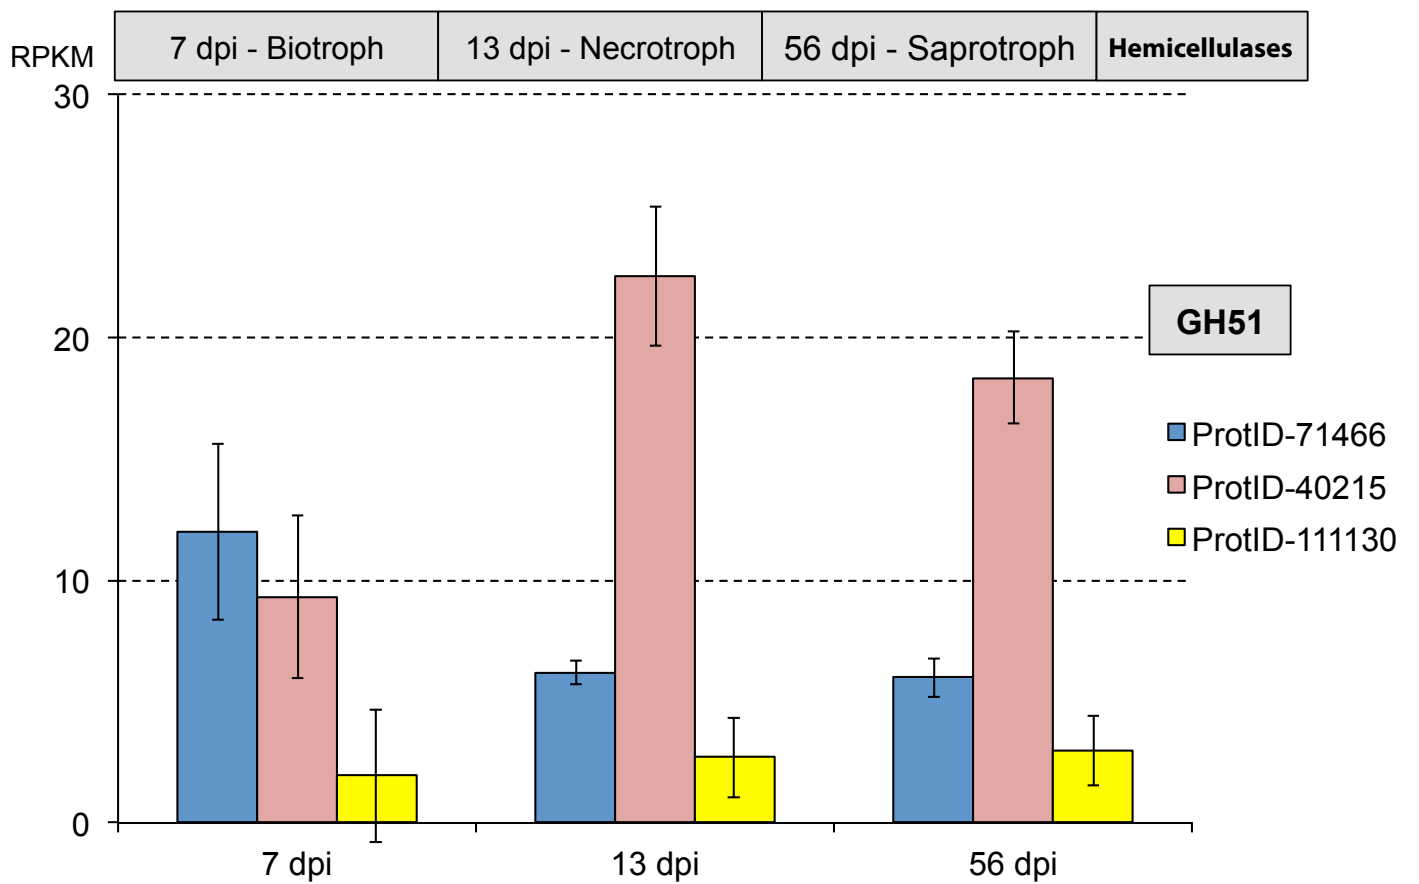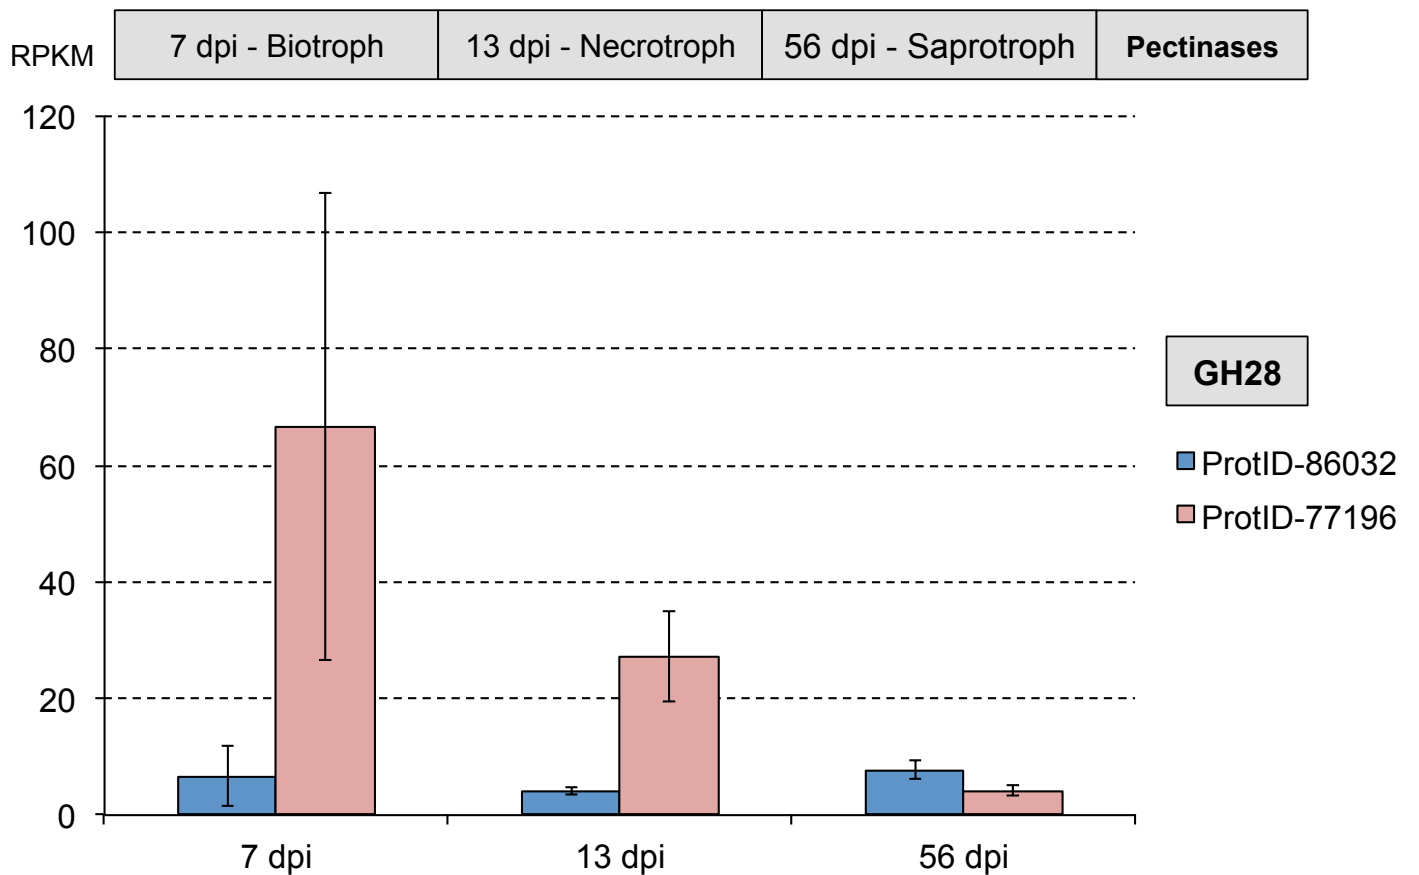

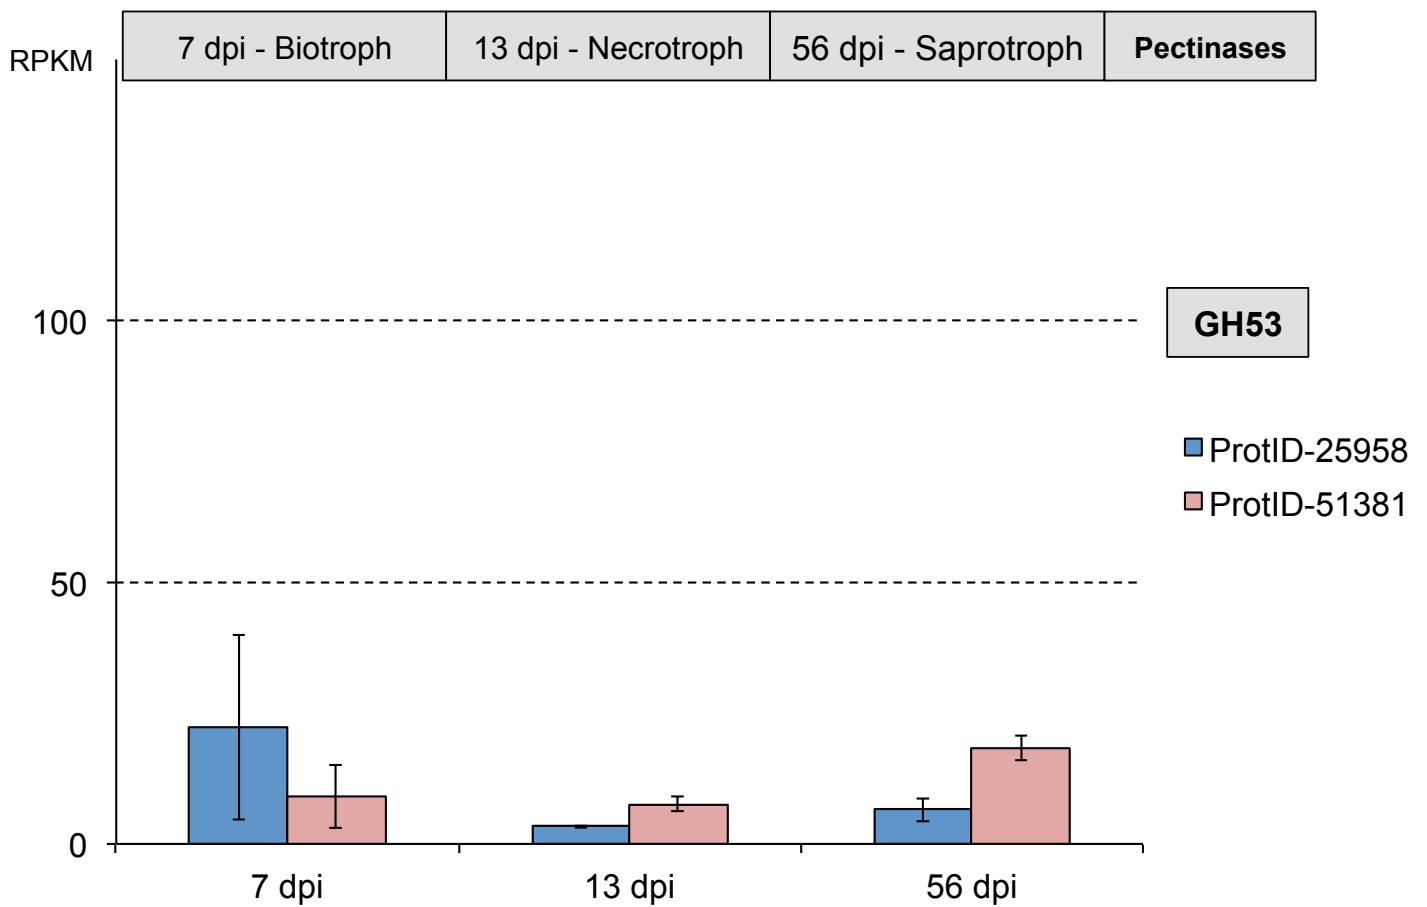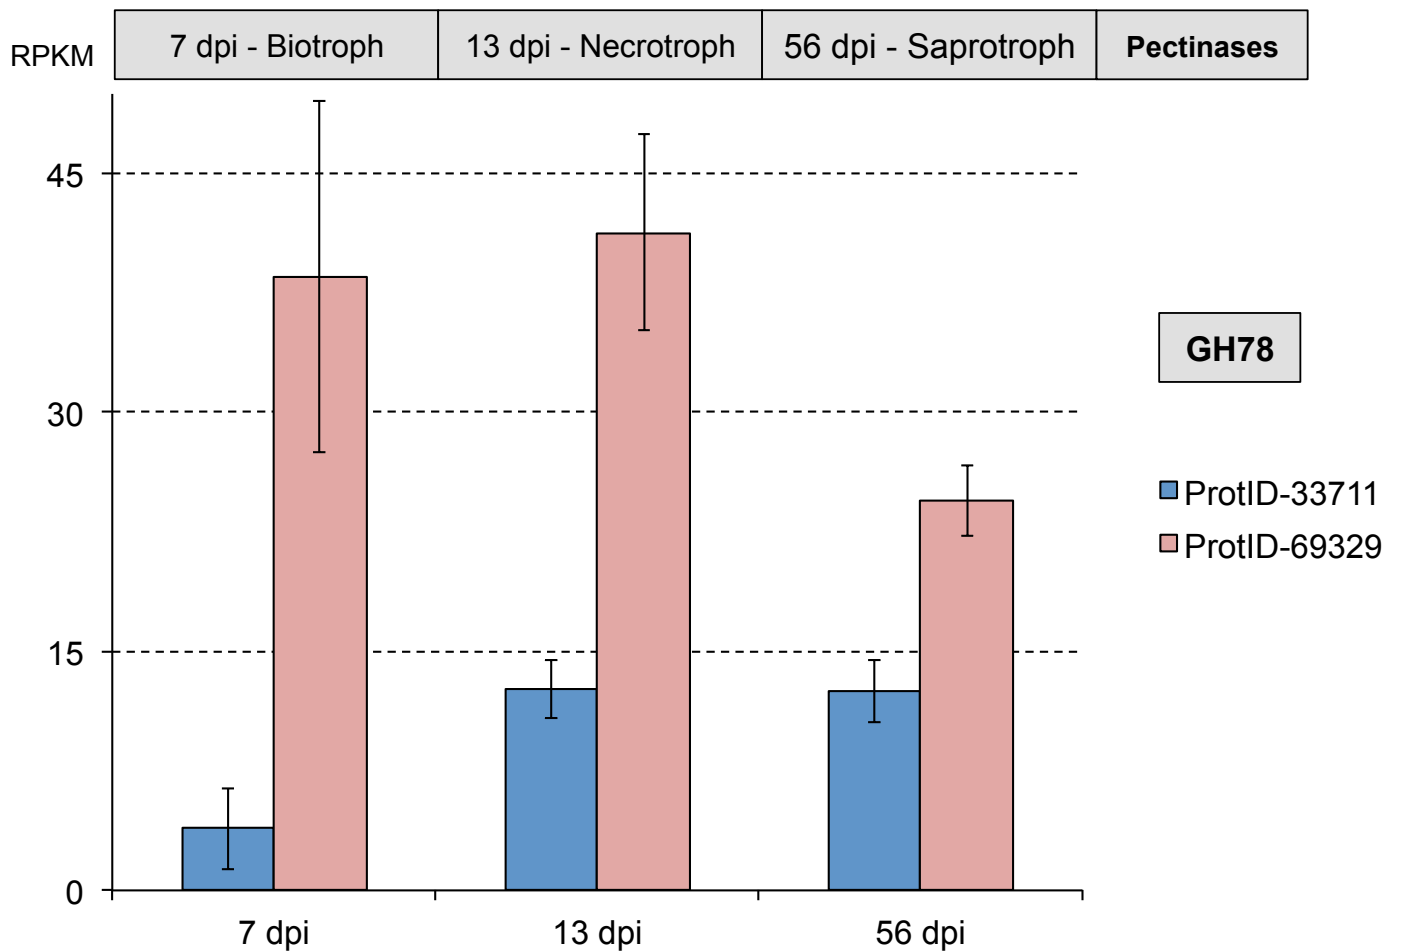

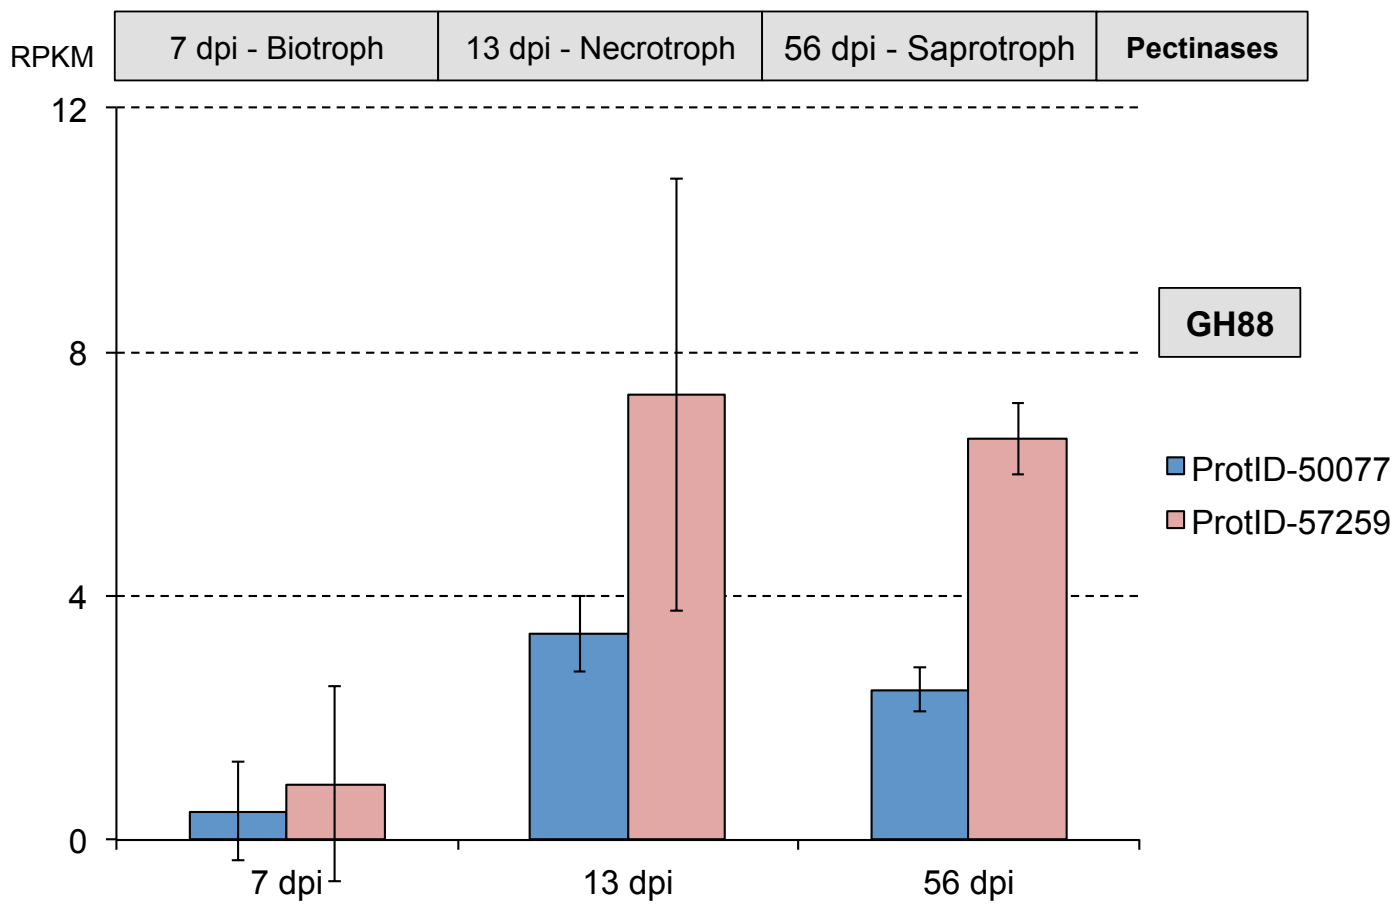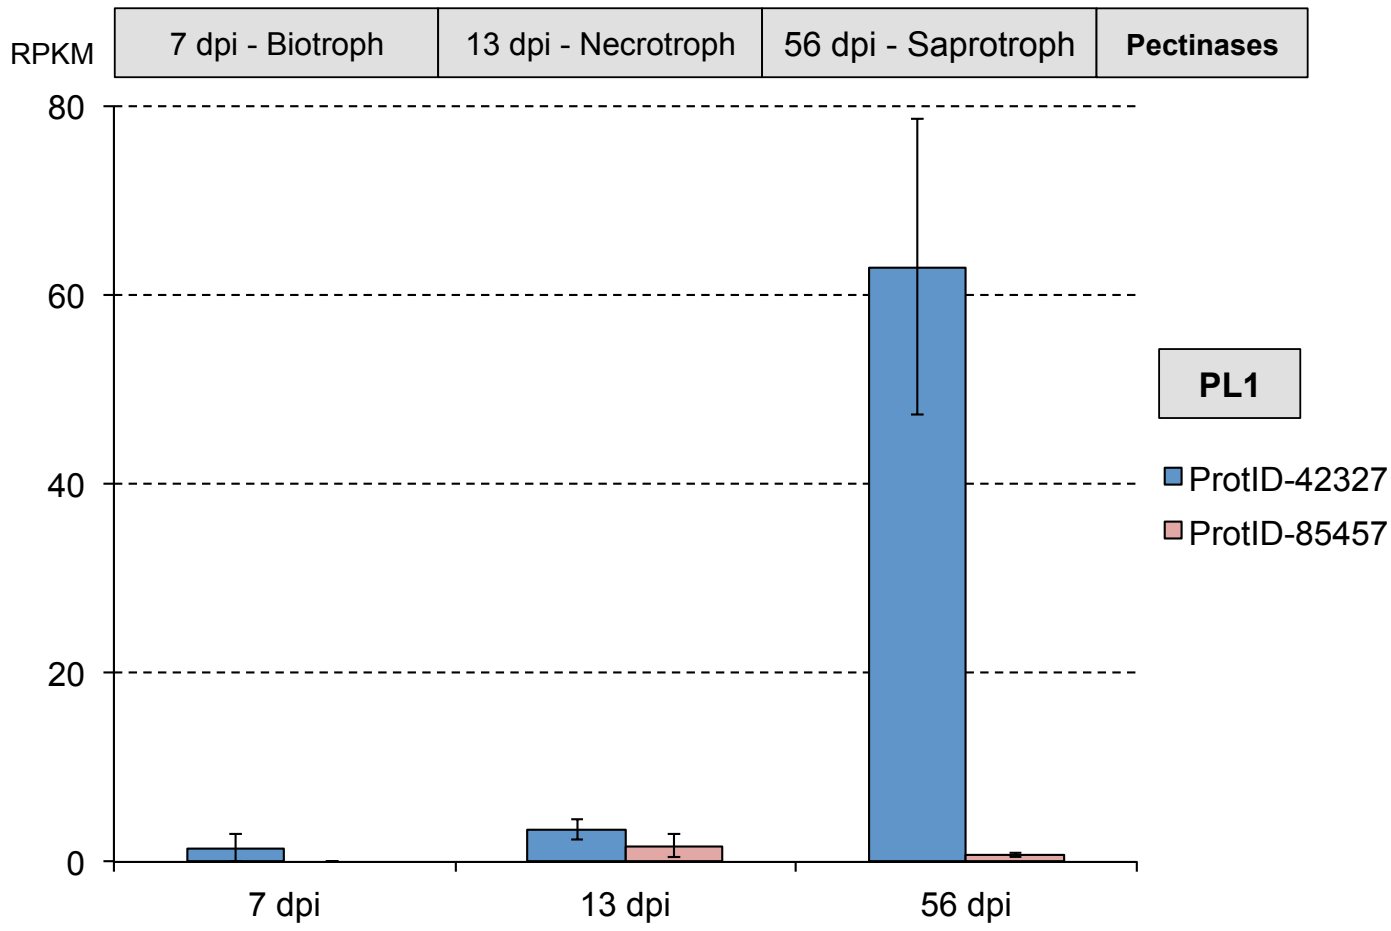

Supplement: supp_mst041_allSupplFiles.pdf [file supp_mst041_allSupplFiles.pdf]
